# Supplementary material
Source: PubMed Central journal article supplement (PMC3591893)
Supplement: AAC.02215-12_zac999101669so1.pdf [file AAC.02215-12_zac999101669so1.pdf]

1 **Materials and Methods**

2

3 *Bacterial isolates*

4 A total of 125 CF *S. maltophilia* isolates from sputum and bronchoalveolar lavage  
5 specimens were prospectively collected from the microbiology laboratories at the Hospital for  
6 Sick Children (74 isolates from 51 CF patients; maximum of 2 isolates per patient)) and St.  
7 Michael's Hospital (51 isolates from 35 CF patients; maximum of 2 isolates per patient) in  
8 Toronto, Canada between January 2011 and July 2012. *S. maltophilia* isolates were stored at -  
9 80°C in glycerol citrate. Upon retrieval from the freezer, each isolate was subcultured 3 times  
10 onto Columbia agar with 5% sheep blood (Oxoid, Nepean, Ontario, Canada) prior to  
11 susceptibility testing.

12

13 *Antibiotic Panels*

14 Antibiotic panels, in a 96-well microtiter plate format, were prepared with cation-  
15 adjusted Mueller Hinton broth (CAMHB; Becton Dickinson, Mississauga, Ontario, Canada)  
16 using 9 different antibiotics (ceftazidime, ticarcillin-clavulanate, tobramycin, levofloxacin,  
17 moxifloxacin, trimethoprim-sulfamethoxazole, doxycycline, colistin, azithromycin). All  
18 antibiotics were obtained from Santa Cruz Biotechnology (Santa Cruz, CA, USA) except for  
19 ticarcillin-clavulanate (Sigma, St Louis, MO, USA), ceftazidime (GlaxoSmithKline,  
20 Mississauga, Ontario, Canada) and moxifloxacin (Bayer, Toronto, Ontario, Canada). For  
21 ceftazidime, ticarcillin-clavulanate, moxifloxacin, trimethoprim-sulfamethoxazole and  
22 doxycycline, antibiotics were tested at 2 concentrations: minimum inhibitory concentration  
23 (MIC) at the susceptible breakpoint and MIC at the intermediate interpretative criteria

24 (correlating to serum achievable concentrations) for *S. maltophilia* and other non-  
25 *Enterobacteriaceae* according to the Clinical and Laboratory Standards Institute (CLSI) (1). For  
26 azithromycin, as there are no CLSI interpretative criteria for non-fermentative bacilli,  
27 concentrations of 0.4 mg/L and 0.8 mg/L were chosen based on previous studies done on  
28 *Burkholderia cepacia* and *P. aeruginosa* (15). Tobramycin (100 mg/L and 200 mg/L) (2) and  
29 colistin (100 mg/L and 200 mg/L) (3) were tested at concentrations achievable in CF sputum by  
30 aerosolization. Levofloxacin was tested at both high concentrations (50 mg/L and 100 mg/L-  
31 corresponding to achievable sputum levels by aerosolization) (4-5) as well as low concentrations  
32 (2 mg/L and 4 mg/L- corresponding to achievable serum levels). Each well contained 100 µl of  
33 CAMHB with the antibiotic(s), alone or in combinations, at these set concentrations. In total,  
34 there were 10 single drugs (9 different antibiotics including a low and high dose for  
35 levofloxacin) and 37 dual drug combinations tested for each isolate. Each plate had a well that  
36 was a sterility control (only broth, no antibiotics) and a well that was a growth control (broth plus  
37 bacterial inoculum but no antibiotics). Antibiotic panels were stored at -80°C until use.

38

### 39 *Planktonic Antimicrobial Susceptibility Testing*

40 Planktonic susceptibility testing of *S. maltophilia* isolates was performed by broth-  
41 microdilution methods according to CLSI guidelines (1). Bacterial inoculum was prepared by  
42 diluting 1.5 ml of a 0.5 McFarland turbidity standard with 25 ml of distilled water. 10 µl of the  
43 bacterial inoculum was added to each well of the prepared antibiotic testing panel and incubated  
44 in aerobic conditions at 37°C for 18 – 24 hours overnight. The plates were read the following day  
45 by assessing turbidity within the wells as signs of bacterial growth.

46

47 *Biofilm Antimicrobial Susceptibility Testing*

48 *S. maltophilia* isolates were grown as biofilms using the Calgary biofilm technique (6)  
49 with a few modifications. The bacterial inoculum was prepared by diluting 300 µl of a 0.5  
50 McFarland turbidity standard in 19.7 ml of Trypticase-Soy Broth. 100 µl of the inoculum was  
51 added to each well of a 96-well microtitre plate with a peg lid (Innovotech, Manitoba, Canada).  
52 The plates were incubated in aerobic conditions at 37°C on a shaker (Labnet Orbit 1000,  
53 Woodbridge, New Jersey) to allow for biofilm formation on the peg lid. An estimation of the  
54 inoculum was determined by measuring OD<sub>650nm</sub> using the MRX Microplate Reader (Dynex  
55 Technologies, Chantilly, Virginia) of the broth in the well in which the biofilm peg was growing.  
56 Once an OD of approximately 0.062 was achieved (known to correspond to approximately 10<sup>5</sup>  
57 colony forming units (CFU)/ml), the biofilm-laden peg lid was placed into the antibiotic testing  
58 panel. To confirm that the proper inoculum had been achieved, an inoculum check was  
59 performed by serial dilutions and plating of the broth from the well onto solid media in which the  
60 biofilm peg was growing for each isolate tested. If the inoculum did not fall between 10<sup>4</sup>-10<sup>6</sup>  
61 CFU/ml, testing was repeated. The antibiotic panel was then incubated for 18-24 hours under  
62 aerobic conditions at 37°C. Each biofilm-laden peg was was placed in 200 µl of sterile distilled  
63 water to rinse out residual antibiotics, before being placed into 100 µl of CAMHB in the  
64 recovery plate. The plate was then incubated for 18-24 hours under aerobic conditions at 37°C  
65 and assessed for turbidity the following day. Biofilm inhibitory concentrations were determined  
66 as per CLSI planktonic interpretative breakpoints for single drugs.

67

68 *Interpretative criteria for dual antibiotic combinations*

69 For dual drug combinations, the isolate was considered: resistant if resistant to both  
70 drugs; intermediate if intermediate to both drugs; and sensitive if sensitive to both drugs. For  
71 example, when testing doxycycline and ceftazidime in dual drug combinations, these drugs were  
72 combined in the following way: doxycycline at 4 mg/L (susceptible breakpoint) with ceftazidime  
73 at 8 mg/L (susceptible breakpoint) and doxycycline at 8 mg/L (intermediate interpretative  
74 criteria) with ceftazidime at 16 mg/L (intermediate interpretative criteria). If there was no growth  
75 at doxycycline 4 mg/L /ceftazidime 8 mg/L, the isolate was considered susceptible. If there was  
76 no growth at doxycycline 8 mg/L/ceftazidime 16 mg/L but growth at doxycycline 4  
77 mg/L/ceftazidime 8 mg/L, the isolate was considered intermediate. If there was growth with both  
78 of these dual drug concentrations, the isolates was considered resistant.

79

#### 80 *Statistical Analysis*

81 The proportion of isolates susceptible to different antibiotics by planktonic growth were  
82 compared to results by biofilm growth using Chi-square or Fisher's exact test where appropriate  
83 (GraphPad Prism version 5.04).

84

85 **References**

- 86 1. Clinical and Laboratories Standards Institute. 2012. Performance standards for  
87 antimicrobial susceptibility testing: 22<sup>nd</sup> informational supplement M100-S22. CLSI, Wayne,  
88 PA.
- 89 2. Dales L, Ferris W, Vandemheen K, Aaron SD. 2009. Combination antibiotic  
90 susceptibility of biofilm-grown *Burkholderia cepacia* and *Pseudomonas aeruginosa* isolated  
91 from patients with pulmonary exacerbations of cystic fibrosis. *Eur. J. Clin. Microbiol. Infect.*  
92 *Dis.* **28(10)**:1275-9.
- 93 3. San Gabriel P, Zhou J, Tabibi S, Chen Y, Trauzzi M, Saiman L. 2004. Antimicrobial  
94 susceptibility and synergy studies of *Stenotrophomonas maltophilia* isolates from patients with  
95 cystic fibrosis. *Antimicrob. Agents Chemother.* **48(1)**:168-71.
- 96 4. Sabet M, Miller CE, Nolan TG, Senekeo-Effenberger K, Dudley MN, Griffith DC. 2009.  
97 Efficacy of aerosol MP-376, a levofloxacin inhalation solution, in models of mouse lung  
98 infection due to *Pseudomonas aeruginosa*. *Antimicrob. Agents Chemother.* **53(9)**:3923-8.
- 99 5. Geller DE, Flume PA, Griffith DC, Morgan E, White D, Loutit JS, Dudley, MN. 2011.  
100 Pharmacokinetics and safety of MP-376 (levofloxacin inhalation solution) in cystic fibrosis  
101 subjects. *Antimicrob. Agents Chemother.* **55(6)**:2636-40.
- 102 6. Ceri H, Olson ME, Stremick C, Read RR, Morck D, Buret A. 1999. The Calgary Biofilm  
103 Device: new technology for rapid determination of antibiotic susceptibilities of bacterial  
104 biofilms. *J. Clin. Microbiol.* **37(6)**:1771-6.

105  
106

107

108 **Table 1.**

109 **A. Antibiotic combinations against planktonically-grown *S. maltophilia* isolates**

| <b>Antibiotic combination</b>                              | <b>% (n) of susceptible isolates</b> |
|------------------------------------------------------------|--------------------------------------|
| Levofloxacin <sub>100</sub> /azithromycin                  | 99 (124)                             |
| Levofloxacin <sub>100</sub> /trimethoprim-sulfamethoxazole | 99 (124)                             |
| Levofloxacin <sub>100</sub> /ticarcillin-clavulanate       | 99 (124)                             |
| Levofloxacin <sub>100</sub> /colistin <sub>200</sub>       | 99 (124)                             |
| Doxycycline/colistin <sub>200</sub>                        | 98 (123)                             |
| Levofloxacin <sub>100</sub> /ceftazidime                   | 98 (123)                             |
| Colistin <sub>200</sub> /trimethoprim-sulfamethoxazole     | 98 (123)                             |
| Tobramycin/levofloxacin <sub>100</sub>                     | 98 (123)                             |
| Levofloxacin <sub>4</sub> /colistin <sub>200</sub>         | 98 (122)                             |
| Moxifloxacin/colistin <sub>200</sub>                       | 98 (122)                             |
| Ceftazidime/colistin <sub>200</sub>                        | 97 (121)                             |
| Doxycycline/ticarcillin-clavulanate                        | 96 (120)                             |
| Doxycycline/levofloxacin <sub>100</sub>                    | 96 (120)                             |
| Doxycycline/moxifloxacin                                   | 96 (120)                             |
| Doxycycline/trimethoprim-sulfamethoxazole                  | 95 (119)                             |
| Doxycycline/ceftazidime                                    | 94 (118)                             |
| Moxifloxacin/ticarcillin-clavulanate                       | 94 (118)                             |
| Doxycycline/levofloxacin <sub>4</sub>                      | 94 (117)                             |
| Ticarcillin-clavulanate/colistin <sub>200</sub>            | 92 (115)                             |
| Levofloxacin <sub>4</sub> /ticarcillin-clavulanate         | 92 (115)                             |
| Moxifloxacin/trimethoprim-sulfamethoxazole                 | 92 (115)                             |
| Moxifloxacin/ceftazidime                                   | 92 (115)                             |
| Doxycycline/azithromycin                                   | 90 (112)                             |
| Levofloxacin <sub>4</sub> /trimethoprim-sulfamethoxazole   | 90 (112)                             |
| Moxifloxacin/tobramycin <sub>200</sub>                     | 86 (107)                             |
| Doxycycline/tobramycin <sub>200</sub>                      | 84 (105)                             |
| Moxifloxacin/azithromycin                                  | 84 (105)                             |
| Levofloxacin <sub>4</sub> /ceftazidime                     | 83 (104)                             |
| Tobramycin <sub>200</sub> /trimethoprim-sulfamethoxazole   | 82 (102)                             |
| Ticarcillin-clavulanate/trimethoprim-sulfamethoxazole      | 80 (100)                             |
| Ceftazidime/trimethoprim-sulfamethoxazole                  | 79 (99)                              |
| Tobramycin <sub>200</sub> /ticarcillin-clavulanate         | 72 (90)                              |
| Levofloxacin <sub>4</sub> /azithromycin                    | 69 (86)                              |
| Tobramycin <sub>200</sub> /ceftazidime                     | 65 (81)                              |
| Tobramycin <sub>200</sub> /azithromycin                    | 61 (76)                              |
| Ticarcillin-clavulanate/azithromycin                       | 34 (42)                              |
| Ceftazidime/azithromycin                                   | 21 (26)                              |

110

111

112 **B. Antibiotic combinations against biofilm-grown *S.maltophilia* isolates**

| <b>Antibiotic combination</b>                              | <b>% (n) of susceptible isolates</b> |
|------------------------------------------------------------|--------------------------------------|
| Ceftazidime/colistin <sub>200</sub>                        | 65 (81)                              |
| Levofloxacin <sub>100</sub> /ticarcillin-clavulanate       | 62 (78)                              |
| Colistin <sub>200</sub> /trimethoprim-sulfamethoxazole     | 62 (78)                              |
| Moxifloxacin/colistin <sub>200</sub>                       | 61 (76)                              |
| Doxycycline/colistin <sub>200</sub>                        | 60 (75)                              |
| Levofloxacin <sub>100</sub> /ceftazidime                   | 59 (74)                              |
| Levofloxacin <sub>100</sub> /azithromycin                  | 58 (73)                              |
| Levofloxacin <sub>100</sub> /colistin <sub>200</sub>       | 58 (72)                              |
| Levofloxacin <sub>4</sub> /colistin <sub>200</sub>         | 58 (72)                              |
| Ticarcillin-clavulanate/colistin <sub>200</sub>            | 58 (72)                              |
| Levofloxacin <sub>100</sub> /trimethoprim-sulfamethoxazole | 51 (64)                              |
| Doxycycline/levofloxacin <sub>100</sub>                    | 44 (55)                              |
| Moxifloxacin/ceftazidime                                   | 39 (49)                              |
| Tobramycin <sub>200</sub> /levofloxacin <sub>100</sub>     | 37 (46)                              |
| Moxifloxacin/trimethoprim-sulfamethoxazole                 | 35 (44)                              |
| Moxifloxacin/ticarcillin-clavulanate                       | 33 (41)                              |
| Moxifloxacin/azithromycin                                  | 30 (37)                              |
| Moxifloxacin/tobramycin <sub>200</sub>                     | 29 (36)                              |
| Doxycycline/tobramycin <sub>200</sub>                      | 24 (30)                              |
| Levofloxacin <sub>4</sub> /trimethoprim-sulfamethoxazole   | 22 (28)                              |
| Levofloxacin <sub>4</sub> /ceftazidime                     | 22 (28)                              |
| Doxycycline/ticarcillin-clavulanate                        | 21 (26)                              |
| Doxycycline/moxifloxacin                                   | 21 (26)                              |
| Levofloxacin <sub>4</sub> /azithromycin                    | 21 (26)                              |
| Tobramycin <sub>200</sub> /trimethoprim-sulfamethoxazole   | 21 (26)                              |
| Doxycycline/levofloxacin <sub>4</sub>                      | 19 (24)                              |
| Doxycycline/ceftazidime                                    | 18 (22)                              |
| Levofloxacin <sub>4</sub> /ticarcillin-clavulanate         | 18 (22)                              |
| Ceftazidime/trimethoprim-sulfamethoxazole                  | 17 (21)                              |
| Tobramycin <sub>200</sub> /trimethoprim-sulfamethoxazole   | 17 (21)                              |
| Doxycycline/azithromycin                                   | 16 (20)                              |
| Doxycycline/trimethoprim-sulfamethoxazole                  | 14 (18)                              |
| Tobramycin <sub>200</sub> /ceftazidime                     | 14 (17)                              |
| Tobramycin <sub>200</sub> /azithromycin                    | 13 (16)                              |
| Ticarcillin-clavulanate/ trimethoprim-sulfamethoxazole     | 11 (14)                              |
| Ticarcillin-clavulanate/azithromycin                       | 6 (8)                                |
| Ceftazidime/azithromycin                                   | 6 (8)                                |

113

114

115
